# Supplementary material for: Analysis of the genome of the New Zealand giant collembolan (Holacanthella duospinosa) sheds light on hexapod evolution
Source: BMC Genomics. 2017 Oct 17;18:795. doi: 10.1186/s12864-017-4197-1 (PMC5644144; doi:10.1186/s12864-017-4197-1)
Supplement: Supplementary file 9 — The best fitting substitution models and number of meta-partitions for supermatrix A (domain-based) and supermatrix B (gene-based) according to PartitionFinder. (XLSX 5 kb) [file 12864_2017_4197_MOESM9_ESM.xlsx]

## Sheet: Sheet1
Best fit substitution model	Supermatrix A	Supermatrix B
	# meta-partitions (domain-based)	# meta-partitions (gene-based)
LG4X	145 (42.9%)	152 (44.32%)
LG+G+F	98 (28.99%)	112 (32.65%)
JTT+G+F	32 (9.47%)	23 (6.71%)
LG+G	24 (7.10%)	17 (4.96%)
DCMUT+G+F	12 (3.55%)	16 (4.66%)
JTT+G	14 (4.14%)	12 (3.50%)
WAG+G+F	6 (1.78%)	7 (2.04%)
DCMUT+G	4 (1.18%)	3 (0.87%)
BLOSUM62+G+F	3 (0.89%)	---
WAG+G	---	1 (0.29 %)
Total # of meta-partitions¹	338	343
# sites	370877	323917
Best scheme AICc	645652168651	588911348006
Best scheme lnL	-322392676868	-294003240271
